# Supplementary material
Source: Springer Nature journal article supplement (https://www.springermedizin.de/resource/supplementary/12885_2013_4633_MOESM3_ESM.pdf/9466896)

**A****miR-155**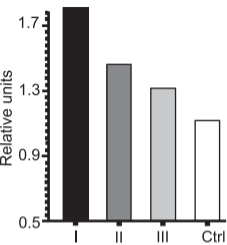**miR-19a**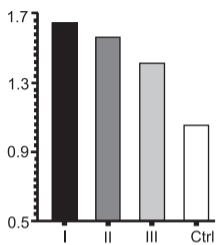**miR-181b**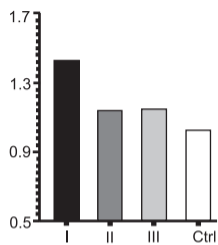**miR-24**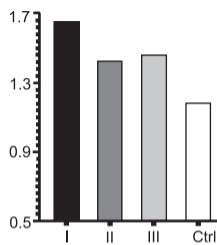**B****miR-155**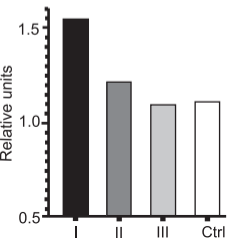**miR-19a**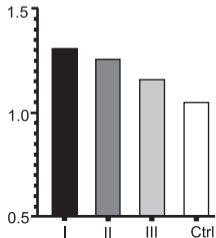**miR-181b**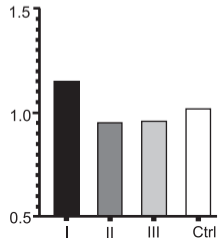**miR-24**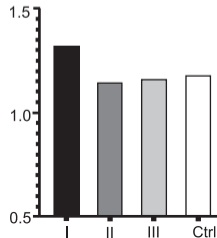

Supplement: MOESM3 [file 9466896]
